# Supplementary material for: Synthesis of zirconium-based metal–organic frameworks with iron(ii) clathrochelate ligands
Source: Royal Society of Chemistry journal article supplement (doi:10.1039/d2ce01686a), 2023-01-01
Supplement: d2ce01686a1.pdf [file d2ce01686a1.pdf]

## Supporting Information

### Synthesis of Zirconium-Based Metal-Organic Frameworks with Iron(II) Clathrochelate Ligands

Suchetha Shetty,<sup>1,2,†</sup> Karam B. Idrees,<sup>3,†</sup> Haomiao Xie,<sup>3</sup> Bassam Alameddine<sup>1, 2,\*</sup> and Omar  
K. Farha<sup>3,4,\*</sup>

<sup>1</sup> Department of Mathematics and Natural Sciences, Gulf University for Science and Technology,  
Kuwait

<sup>2</sup> Functional Materials Group, Gulf University for Science and Technology, Kuwait

<sup>3</sup> Department of Chemistry and International Institute for Nanotechnology, Northwestern  
University, 2145 Sheridan Road, Evanston, Illinois 60208, United States

<sup>4</sup> Department of Chemical & Biological Engineering, Northwestern University, Evanston,  
Illinois 60208, United States

Corresponding author: e-mail: o-farha@northwestern.edu; Alameddine.B@gust.edu.kw

#### Contents

|                                                                                                                                                |           |
|------------------------------------------------------------------------------------------------------------------------------------------------|-----------|
| The Experimental PXRD patterns of <b>Zr-GU-3,4</b>                                                                                             | Figure S1 |
| Obtained crystal for <b>Zr-GU-2</b> for SCXRD analysis                                                                                         | Figure S2 |
| The comparative experimental PXRD patterns of <b>Zr-GU-1</b> synthesized,<br>after ScCO <sub>2</sub> activation and DMF soaked post activation | Figure S3 |
| Crystal data and structure refinement for <b>Zr-GU-1</b>                                                                                       | Table S1  |

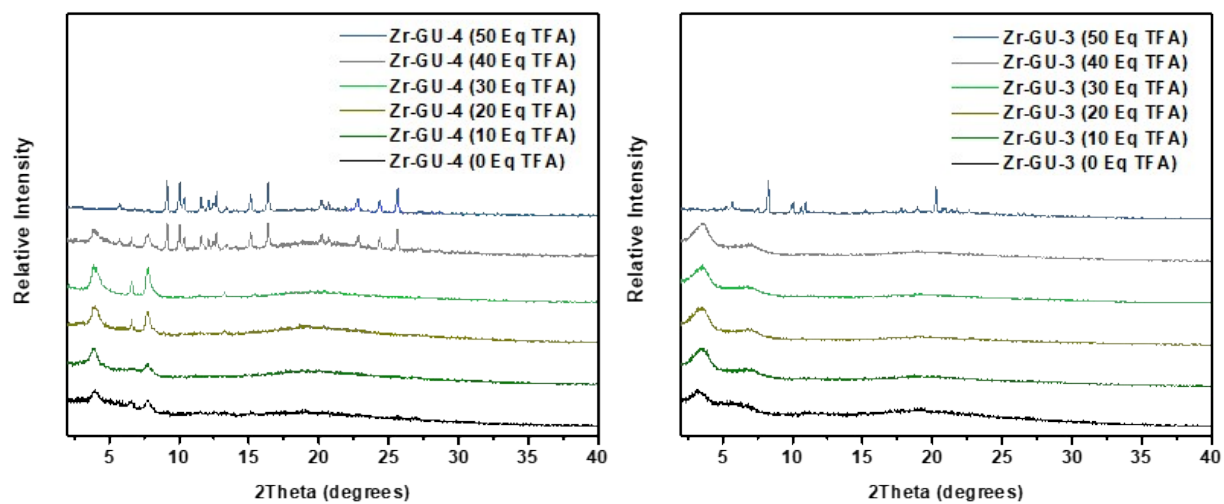

**Figure S1.** Experimental PXRD patterns of Zr-GU-3,4

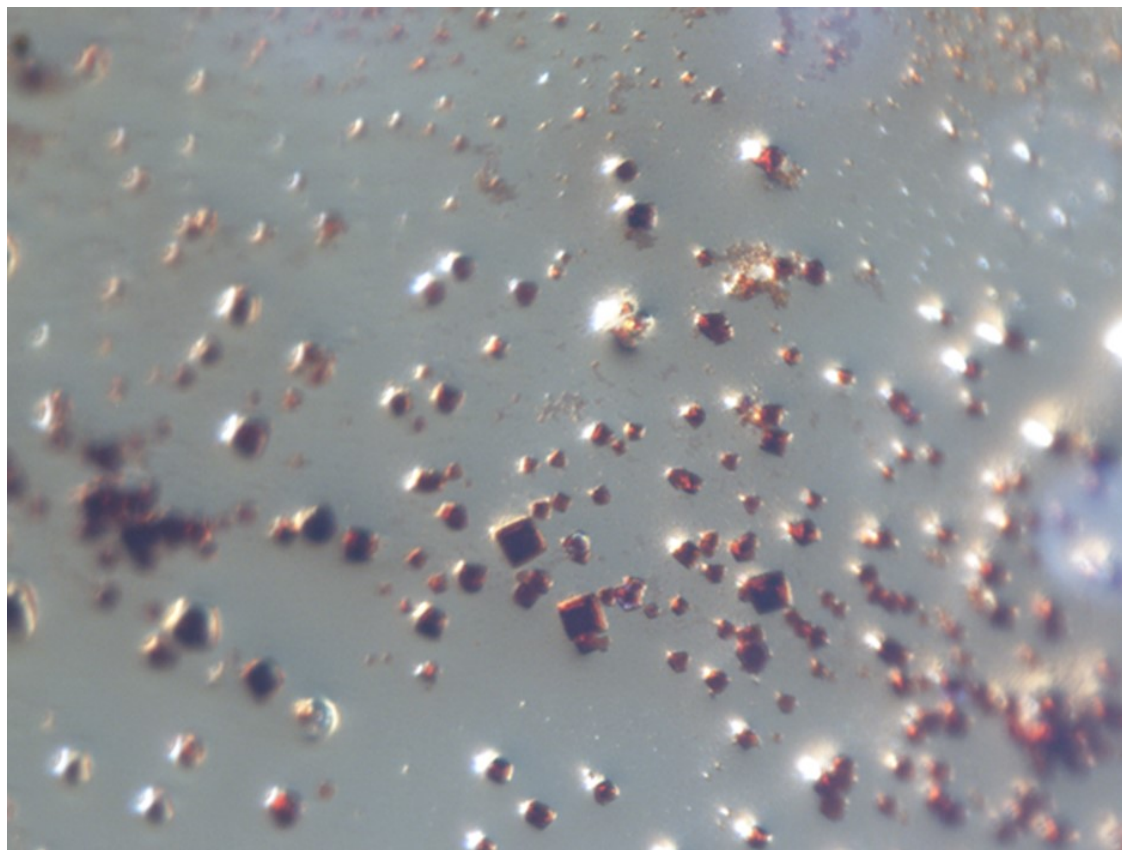

**Figure S2.** Obtained crystal for **Zr-GU-2** for SCXRD analysis (Crystals were not stable and decomposed during mounting process thus cannot be solved)

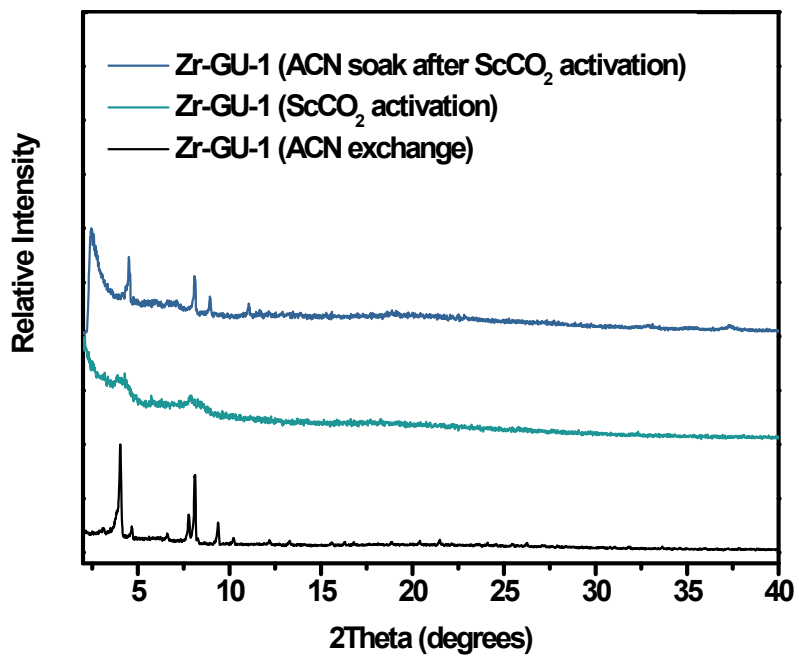

**Figure S3.** The comparative experimental PXRD patterns of **Zr-GU-1** as-synthesized, after ScCO<sub>2</sub> activation and DMF soaked post activation

**Table S1.** Crystal data and structure refinement for Zr-GU-1

|                                                              |                                                                                                                  |
|--------------------------------------------------------------|------------------------------------------------------------------------------------------------------------------|
| Identification code                                          | Zr-GU-1                                                                                                          |
| Empirical formula                                            | C <sub>120</sub> H <sub>48</sub> B <sub>12</sub> Fe <sub>6</sub> N <sub>36</sub> O <sub>68</sub> Zr <sub>6</sub> |
| Formula weight                                               | 4094.08                                                                                                          |
| Temperature/K                                                | 200.01(10)                                                                                                       |
| Crystal system                                               | cubic                                                                                                            |
| Space group                                                  | <i>Fm-3m</i>                                                                                                     |
| <i>a</i> /Å                                                  | 37.5848(3)                                                                                                       |
| <i>b</i> /Å                                                  | 37.5848(3)                                                                                                       |
| <i>c</i> /Å                                                  | 37.5848(3)                                                                                                       |
| $\alpha$ /°                                                  | 90                                                                                                               |
| $\beta$ /°                                                   | 90                                                                                                               |
| $\gamma$ /°                                                  | 90                                                                                                               |
| Volume/Å <sup>3</sup>                                        | 53092.7(14)                                                                                                      |
| <i>Z</i>                                                     | 4                                                                                                                |
| $\rho_{\text{calc}}$ /g/cm <sup>3</sup>                      | 0.512                                                                                                            |
| $\mu$ /mm <sup>-1</sup>                                      | 2.471                                                                                                            |
| <i>F</i> (000)                                               | 8080.0                                                                                                           |
| Crystal size/mm <sup>3</sup>                                 | 0.2 × 0.2 × 0.15                                                                                                 |
| Radiation                                                    | Cu K $\alpha$ ( $\lambda$ = 1.54184)                                                                             |
| 2 $\Theta$ range for data collection/°                       | 7.802 to 158.742                                                                                                 |
| Index ranges                                                 | -30 ≤ <i>h</i> ≤ 39, -29 ≤ <i>k</i> ≤ 44, -47 ≤ <i>l</i> ≤ 39                                                    |
| Reflections collected                                        | 26210                                                                                                            |
| Independent reflections                                      | 2811 [ <i>R</i> <sub>int</sub> = 0.0909, <i>R</i> <sub>sigma</sub> = 0.0421]                                     |
| Data/restraints/parameters                                   | 2811/137/106                                                                                                     |
| Goodness-of-fit on <i>F</i> <sup>2</sup>                     | 1.058                                                                                                            |
| Final <i>R</i> indexes [ <i>I</i> ≥ 2 $\sigma$ ( <i>I</i> )] | <i>R</i> <sub>1</sub> = 0.0793, <i>wR</i> <sub>2</sub> = 0.2163                                                  |
| Final <i>R</i> indexes [all data]                            | <i>R</i> <sub>1</sub> = 0.0879, <i>wR</i> <sub>2</sub> = 0.2257                                                  |
| Largest diff. peak/hole / e Å <sup>-3</sup>                  | 0.67/-0.94                                                                                                       |
